# Supplementary material for: Reading outcomes in children with developmental language disorder: A person-centered approach
Source: PubMed Central journal article supplement (PMC9620469; doi:10.1177/2396941520979857), 2020-12-22
Supplement: sj-pdf-1-dli-10.1177_2396941520979857.pdf [file sj-pdf-1-dli-10.1177_2396941520979857.pdf]

Appendices

Appendix A

Correlations

Table A1

*Correlations between Oral Language Proficiency, Phonological Processing, Executive functioning and Reading Ability*

| Variable                            | 1       | 2      | 3      | 4       | 5    | 6       | 7      | 8      | 9      | 10     |
|-------------------------------------|---------|--------|--------|---------|------|---------|--------|--------|--------|--------|
| 1 Vocabulary                        | -       |        |        |         |      |         |        |        |        |        |
| 2 Morphology                        | .55**   | -      |        |         |      |         |        |        |        |        |
| 3 Sentence Repetition               | .52**   | .61*** | -      |         |      |         |        |        |        |        |
| 4 Phonological Processing           | .43***  | .44*** | .56*** | -       |      |         |        |        |        |        |
| 5 Interference Control              | .06     | .05    | .06    | .05     | -    |         |        |        |        |        |
| 6 Selective Attention               | -.41*** | -.19   | -.24*  | -.46*** | .01  | -       |        |        |        |        |
| 7 Verbal WM                         | .40***  | .35**  | .38*** | .59***  | -.17 | -.47*** | -      |        |        |        |
| 8 Visual-spatial WM                 | .41***  | .31**  | .39*** | .47***  | -.12 | -.44*** | .66*** | -      |        |        |
| 9 Nonverbal Intelligence            | .32**   | .14    | .15    | .34**   | -.15 | -.46*** | .45*** | .44*** | -      |        |
| 10 Single word reading (time 2)     | .16     | .08    | .16    | .38***  | -.06 | -.33**  | .46*** | .40*** | .43*** | -      |
| 11 Single non-word reading (time 2) | .14     | .09    | .24*   | .41***  | .01  | -.30**  | .41*** | .36**  | .34**  | .84*** |

\*  $p < .05$ , \*\*  $p < .01$ , \*\*\*  $p < .001$

Appendix B  
Supplemental Model Results LPA

Table B1

*Average Latent Profile Probabilities for Most Likely Latent Profile Membership by Latent Profile*

|                                                               | Weak<br>Development<br>Overall | Average<br>Language and<br>PP with Strong<br>EF | Average<br>Language and<br>PP with Mild<br>WM<br>Deficiencies | Strong<br>Development<br>Overall |
|---------------------------------------------------------------|--------------------------------|-------------------------------------------------|---------------------------------------------------------------|----------------------------------|
| Weak<br>Development<br>Overall                                | <b>0.92</b>                    | 0.00                                            | 0.09                                                          | 0.00                             |
| Average<br>Language and<br>PP with Strong<br>EF               | 0.00                           | <b>0.94</b>                                     | 0.01                                                          | 0.04                             |
| Average<br>Language and<br>PP with Mild<br>WM<br>Deficiencies | 0.01                           | 0.04                                            | <b>0.95</b>                                                   | 0.00                             |
| Strong<br>Development<br>Overall                              | 0.00                           | 0.06                                            | 0.00                                                          | <b>0.94</b>                      |

*Note.* Profiles were labelled relative to their position within the overall DLD sample. PP = Phonological Processing, EF = Executive Functioning, WM = Working Memory.

1 Table B2

2 *Standardized Mean Differences for all Pairwise Profile Comparisons for each Indicator*

| Variable                | <i>Weak Development Overall versus Average Language and PP with Strong EF</i> | <i>Weak Development Overall versus Average Language and PP with Mild WM Deficiencies</i> | <i>Weak Development Overall versus Strong Development Overall</i> | <i>Average Language and PP with Strong EF versus Average Language and PP with Mild WM Deficiencies</i> | <i>Average Language and PP with Strong EF versus Strong Development Overall</i> | <i>Average Language and PP with Mild WM Deficiencies versus Strong Development Overall</i> |
|-------------------------|-------------------------------------------------------------------------------|------------------------------------------------------------------------------------------|-------------------------------------------------------------------|--------------------------------------------------------------------------------------------------------|---------------------------------------------------------------------------------|--------------------------------------------------------------------------------------------|
| Receptive Vocabulary    | -1.92                                                                         | -1.83                                                                                    | -3.43                                                             | 0.09                                                                                                   | -1.51                                                                           | -1.61                                                                                      |
| Morphology              | -0.96                                                                         | -0.90                                                                                    | -2.38                                                             | 0.06                                                                                                   | -1.42                                                                           | -1.48                                                                                      |
| Sentence Repetition     | -0.65                                                                         | -0.63                                                                                    | -2.72                                                             | 0.01                                                                                                   | -2.07                                                                           | -2.08                                                                                      |
| Phonological Processing | -2.86                                                                         | -2.17                                                                                    | -4.30                                                             | 0.68                                                                                                   | -1.44                                                                           | -2.13                                                                                      |
| Interference Control    | -0.36                                                                         | -0.71                                                                                    | -0.25                                                             | -0.39                                                                                                  | 0.12                                                                            | 0.46                                                                                       |
| Selective Attention     | 3.20                                                                          | 2.46                                                                                     | 3.46                                                              | -0.74                                                                                                  | 0.26                                                                            | 1.00                                                                                       |
| Verbal WM               | -4.07                                                                         | -1.02                                                                                    | -4.64                                                             | 3.04                                                                                                   | -0.58                                                                           | -3.62                                                                                      |
| Visual-spatial WM       | -2.47                                                                         | -0.57                                                                                    | -3.13                                                             | 1.90                                                                                                   | -0.60                                                                           | -2.56                                                                                      |

3 *Note.* Profiles were labelled relative to their position within the overall DLD sample. PP = Phonological Processing, EF = Executive Functioning, WM = Working Memory.

4

5

6
